# Supplementary material for: The effect of intermittent preventive treatment on anti-malarial drug resistance spread in areas with population movement
Source: PubMed Central journal article supplement (PMC4289180; doi:10.1186/1475-2875-13-428), 2014-11-15
Supplement: 12936_2014_3653_MOESM1_ESM.pdf [file 12936_2014_3653_MOESM1_ESM.pdf]

# S1: Supplemental Document

## Model Equations

### Human Dosing Model with Movement in the High Transmission Area

$$\begin{aligned}\frac{dS_H}{dt} &= \mu - \Lambda_H S_H + \omega P_H + \sigma A_H - c S_H + (1-b)r_2 T'_{H3} + r_2 T_{H2} - \mu S_H + \frac{p_{21}}{m} [S_L - S_H] \\ \frac{dD_H}{dt} &= \lambda \rho \Lambda_H S_H - a D_H + (\nu + d \Lambda_H) \rho A_H - \mu D_H + \frac{p_{21}}{m} [D_L - D_H] \\ \frac{dA_H}{dt} &= (1 - \lambda \rho) \Lambda_H S_H - g A_H - \sigma A_H - c A_H - (\nu + d \Lambda_H) \rho A_H - \mu A_H + \frac{p_{21}}{m} [A_L - A_H] \\ \frac{dT_{H1}}{dt} &= a D_H - r_1 T_{H1} - \mu T_{H1} + \frac{p_{21}}{m} [T_{L1} - T_{H1}] \\ \frac{dT'_{H1}}{dt} &= r_1 T_{H1} - r_2 T'_{H1} - \mu T'_{H1} + \frac{p_{21}}{m} [T'_{L1} - T'_{H1}] \\ \frac{dT_{H2}}{dt} &= c S_H - r_1 T_{H2} - \mu T_{H2} + \frac{p_{21}}{m} [T_{L2} - T_{H2}] \\ \frac{dT'_{H2}}{dt} &= r_1 T_{H2} - r_2 T'_{H2} - \mu T'_{H2} + \frac{p_{21}}{m} [T'_{L2} - T'_{H2}] \\ \frac{dT_{H3}}{dt} &= c A_H - r_1 T_{H3} - \mu T_{H3} + \frac{p_{21}}{m} [T_{L3} - T_{H3}], \\ \frac{dT'_{H3}}{dt} &= r_1 T_{H3} - r_2 T'_{H3} - \mu T'_{H3} + \frac{p_{21}}{m} [T'_{L3} - T'_{H3}] \\ \frac{dP_H}{dt} &= g A_H + r_2 T'_{H1} + b r_2 T'_{H3} - \omega P_H - \gamma \Lambda_H P_H - \mu P_H + \frac{p_{21}}{m} [P_L - P_H] \\ \frac{dS_{Ha}}{dt} &= \omega' P_{Ha} - \Lambda_H S_{Ha} - \mu S_{Ha} + \frac{p_{21}}{m} [S_{La} - S_{Ha}] \\ \frac{dD_{Ha}}{dt} &= \lambda' \rho \Lambda_H S_{Ha} - a D_{Ha} + \nu' \rho A_{Ha} - \mu D_{Ha} + \frac{p_{21}}{m} [D_{La} - D_{Ha}] \\ \frac{dA_{Ha}}{dt} &= (1 - \lambda' \rho) \Lambda_H S_{Ha} - g A_{Ha} - \nu' \rho A_{Ha} - \mu A_{Ha} + \frac{p_{21}}{m} [A_{La} - A_{Ha}] \\ \frac{dT_{Ha}}{dt} &= a D_{Ha} - r_1 T_{Ha} - \mu T_{Ha} + \frac{p_{21}}{m} [T_{La} - T_{Ha}] \\ \frac{dT'_{Ha}}{dt} &= r_1 T_{Ha} - r_2 T'_{Ha} - \mu T'_{Ha} + \frac{p_{21}}{m} [T'_{La} - T'_{Ha}] \\ \frac{dP_{Ha}}{dt} &= \gamma \Lambda_H P_H + r_2 T'_{Ha} + g A_{Ha} - \omega' P_{Ha} - \mu P_{Ha} + \frac{p_{21}}{m} [P_{La} - P_{Ha}]\end{aligned}\tag{1H}$$

# Human Dosing Model with Movement in the Low Transmission Area

$$\begin{aligned}
\frac{dS_L}{dt} &= \mu - \Lambda_L S_L + \omega P_L + \sigma A_L - c S_L + (1-b)r_2 T'_{L3} + r_2 T_{L2} - \mu S_L + mp_{12}[S_H - S_L] \\
\frac{dD_L}{dt} &= \lambda \rho \Lambda_L S_L - a D_L + (\nu + d \Lambda_L) \rho A_L - \mu D_L + mp_{12}[D_H - D_L] \\
\frac{dA_L}{dt} &= (1 - \lambda \rho) \Lambda_L S_L - g A_L - \sigma A_L - c A_L - (\nu + d \Lambda_L) \rho A_L - \mu A_L + mp_{12}[A_H - A_L] \\
\frac{dT_{L1}}{dt} &= a D_L - r_1 T_{L1} - \mu T_{L1} + mp_{12}[T_{H1} - T_{L1}] \\
\frac{dT'_{L1}}{dt} &= r_1 T_{L1} - r_2 T'_{L1} - \mu T'_{L1} + mp_{12}[T'_{H1} - T'_{L1}] \\
\frac{dT_{L2}}{dt} &= c S_L - r_1 T_{L2} - \mu T_{L2} + mp_{12}[T_{H2} - T_{L2}] \\
\frac{dT'_{L2}}{dt} &= r_1 T_{L2} - r_2 T'_{L2} - \mu T'_{L2} + mp_{12}[T'_{H2} - T'_{L2}] \\
\frac{dT_{L3}}{dt} &= c A_L - r_1 T_{L3} - \mu T_{L3} + mp_{12}[T_{H3} - T_{L3}], \\
\frac{dT'_{L3}}{dt} &= r_1 T_{L3} - r_2 T'_{L3} - \mu T'_{L3} + mp_{12}[T'_{H3} - T'_{L3}] \\
\frac{dP_L}{dt} &= g A_L + r_2 T'_{L1} + br_2 T'_{L3} - \omega P_L - \gamma \Lambda_L P_L - \mu P_L + mp_{12}[P_H - P_L] \\
\frac{dS_{La}}{dt} &= \omega' P_{La} - \Lambda_L S_{La} - \mu S_{La} + mp_{12}[S_{Ha} - S_{La}] \\
\frac{dD_{La}}{dt} &= \lambda' \rho \Lambda_L S_{La} - a D_{La} + \nu' \rho A_{La} - \mu D_{La} + mp_{12}[D_{Ha} - D_{La}] \\
\frac{dA_{La}}{dt} &= (1 - \lambda' \rho) \Lambda_L S_{La} - g A_{La} - \nu' \rho A_{La} - \mu A_{La} + mp_{12}[A_{Ha} - A_{La}] \\
\frac{dT_{La}}{dt} &= a D_{La} - r_1 T_{La} - \mu T_{La} + mp_{12}[T_{Ha} - T_{La}] \\
\frac{dT'_{La}}{dt} &= r_1 T_{La} - r_2 T'_{La} - \mu T'_{La} + mp_{12}[T'_{Ha} - T'_{La}] \\
\frac{dP_{La}}{dt} &= \gamma \Lambda_L P_L + r_2 T'_{La} + g A_{La} - \omega' P_{La} - \mu P_{La} + mp_{12}[P_{Ha} - P_{La}].
\end{aligned} \tag{1L}$$

Models (1H) and (1L) form a  $32 \times 32$  system of linear ordinary equations with one non-trivial steady state in 32 coordinates. The steady state value can be computed and its exact value numerically found for reasonable experimentally observed malaria related parameter ranges.

## References

- [1] O'Meara WP, Smith DL and McKenzie FE (2006). Potential impact of intermittent preventive treatment (IPT) on spread of drug resistant malaria. PLoS Medicine 3(5): 0633-0642.
